# A Supramodal Neural Network for Speech and Gesture Semantics: An fMRI Study

Benjamin Straube<sup>1,9\*</sup>, Antonia Green<sup>1,2,9</sup>, Susanne Weis<sup>3,4</sup>, Tilo Kircher<sup>1</sup>

**1** Department of Psychiatry and Psychotherapy, Philipps-University Marburg, Marburg, Germany, **2** Department of Psychiatry and Psychotherapy, RWTH Aachen University, Aachen, Germany, **3** Department of Neurology, RWTH Aachen University, Aachen, Germany, **4** Department of Psychology, Durham University, Durham, United Kingdom

## Abstract

In a natural setting, speech is often accompanied by gestures. As language, speech-accompanying iconic gestures to some extent convey semantic information. However, if comprehension of the information contained in both the auditory and visual modality depends on same or different brain-networks is quite unknown. In this fMRI study, we aimed at identifying the cortical areas engaged in supramodal processing of semantic information. BOLD changes were recorded in 18 healthy right-handed male subjects watching video clips showing an actor who either performed speech (S, acoustic) or gestures (G, visual) in more (+) or less (−) meaningful varieties. In the experimental conditions familiar speech or isolated iconic gestures were presented; during the visual control condition the volunteers watched meaningless gestures (G−), while during the acoustic control condition a foreign language was presented (S−). The conjunction of the visual and acoustic semantic processing revealed activations extending from the left inferior frontal gyrus to the precentral gyrus, and included bilateral posterior temporal regions. We conclude that proclaiming this frontotemporal network the brain's core language system is to take too narrow a view. Our results rather indicate that these regions constitute a supramodal semantic processing network.

**Citation:** Straube B, Green A, Weis S, Kircher T (2012) A Supramodal Neural Network for Speech and Gesture Semantics: An fMRI Study. PLoS ONE 7(11): e51207. doi:10.1371/journal.pone.0051207

**Editor:** Emmanuel Andreas Stamatakis, University Of Cambridge, United Kingdom

**Received:** June 19, 2012; **Accepted:** October 30, 2012; **Published:** November 30, 2012

**Copyright:** © 2012 Straube et al. This is an open-access article distributed under the terms of the Creative Commons Attribution License, which permits unrestricted use, distribution, and reproduction in any medium, provided the original author and source are credited.

**Funding:** This research was supported by a grant from the IZKF Aachen (Interdisciplinary Centre for Clinical Research within the faculty of Medicine at RWTH Aachen University; VV N68-e) and by the DFG (Deutsche Forschungsgemeinschaft; IRTG 1328 and Ki 588/6-1). BS is supported by the German Federal Ministry of Education and Research (BMBF; project no. 01GV0615). The funders had no role in study design, data collection and analysis, decision to publish, or preparation of the manuscript.

**Competing Interests:** The authors have declared that no competing interests exist.

\* E-mail: [straubeb@med.uni-marburg.de](mailto:straubeb@med.uni-marburg.de)

<sup>9</sup> These authors contributed equally to this work.

## Introduction

Comprehension of natural language is a complex capacity, depending on several cognitive and neural systems. Over the last years knowledge of the brain processes underlying single word and sentence processing has grown by examining phonological, semantic and syntactic/sentence processing networks. But not only speech is a communicative source, features such as tone of voice, facial expression, body posture, and gestures also transmit meaning that has to be decoded. Whether such meaning derived from speech and gesture is (at least partly) represented in a common neural network is an important question to better understand the neural organization of semantics and especially its flexible utilization for communication. Therefore, this study investigates whether there is a brain network common to the processing of both speech and gesture semantics.

There is consensus that brain regions crucial for the processing of spoken or written language are the left inferior frontal gyrus (LIFG), the left temporal cortex, and their homologues in the right hemisphere [1–3]. Retrieval of semantic information, the processing of semantic relations between words and the processing of syntax in sentences have been related to the LIFG (especially BA 44/45 and 47) [1,4,5]. The left temporal cortex is stronger involved in sentential semantic processing than in syntactic

processing. Especially posterior aspects of the middle temporal gyrus (MTG) and the inferior temporal gyrus (ITG) have been linked to the interpretation of meaning on a sentence level [6], detection of semantic anomalies [7], and maintenance of conceptual information [8,9], with also the right hemispheric homologue areas being involved [10]. These findings are independent of the input modality, i.e. whether the language is presented auditorily (spoken) or visually (written) [11,12].

From behavioral studies it is known that gestures indeed do convey meaning. Several studies using event-related potentials were able to show that gestures induce electrophysiological correlates of semantic processing [13–17]. Except pantomimes (i.e. acting out a whole sequence of information) and emblems (highly conventionalized symbols as the thumbs up-gesture), all kinds of gestures are produced together with speech. However, without accompanying speech the meaning of most gestures is not fixed [18,19]. Concerning the neural correlates of gesture processing without sentence context, several studies have contrasted the viewing of meaningful complex gestures, such as emblems, to that of meaningless gestures. Interestingly, the regions commonly observed are the LIFG including Broca's area (BA 44, 45, 47), as well as the left middle temporal gyrus (MTG; BA 21; [20–22]). This activity was interpreted as the mapping of symbolic

gestures and spoken words onto common, corresponding conceptual representations.

Further support for the idea that gesture semantics might be processed in the same network as spoken language comes from studies on sign language processing. Sign languages (SL) can convey the same information contained in speech, but have visuospatial properties similar to the properties of verbal gestures. Comparable to the results from spoken language processing, neuroimaging studies on SL comprehension indicate a crucial role for the left superior temporal gyrus/sulcus and the LIFG (e.g., [23,24]).

Lastly, there is a growing number of studies examining the processing of gestures in context of speech, highlighting the importance of inferior frontal, posterior temporal and inferior parietal regions (e.g., [25–33]). Based upon the studies available it seems justified to conclude that semantic processing of gestures and semantic processing of speech activates an overlapping neural network involving inferior frontal and posterior temporal regions.

The neural basis of gesture-speech interactions is investigated by an increasing number of functional magnetic resonance imaging (fMRI) studies [25–39]. These studies predominantly focussed on the processing of iconic verbal gestures, suggesting that the left posterior temporal cortex is especially relevant for the integration of iconic gestures and the corresponding sentence context [25,28,31,32]. However, left inferior frontal and parietal brain activations were reported for mismatches between unrelated concrete speech and iconic gesture information [25,29]. Although these studies focussed on the interaction of speech and iconic gesture semantics, common activation patterns for the processing of iconic gestures and speech semantics have not specifically been investigated. In contrast to emblems and pantomimes, iconic gestures are less conventionalized and usually accompany speech. While emblems are socially transmitted and function like learned vocabulary, iconic gestures are shaped individually by speaker's needs. They share a formal relationship with the co-occurring speech content in that they illustrate forms, shapes, events or actions that are the topic of the simultaneously occurring speech. Since without accompanying speech the meaning of iconic gestures is not fixed [18,19] it is unknown if a supramodal network, as demonstrated for symbolic gestures and speech [21], also exists for the comprehension of less language-like stimuli like iconic gestures.

According to the “Feature Integration Model (FIM)” for gesture-speech comprehension proposed by Obermeier, three levels of processing can be divided: 1) The perceptual analysis, 2) feature extraction and 3) integration and higher order cognitive influences ([35]; page 136). Within this model it has been assumed, that the processing of gesture and speech interacts on all processing levels. On the feature extraction level, visual features (e.g., hand shape, trajectory and its meaning) are extracted from gestures and auditory features are extracted from speech (e.g., word form, word category and lemma [semantic meaning]). Yet on this feature extraction level the model predicts interactions between modalities. Thus one could fancy that gesture information facilitates decisions about word category [35]. Assuming that these interactions are based on – at least partly – overlapping activated semantic nodes of a supramodal semantic network, the model predicts common neural correlates of speech and gesture semantics. However, up to now little is known about audio-visual communalities or interactions for iconic gestures and corresponding speech on this intermediate processing level [35].

Based on the findings for language, symbolic gesture and verbal gesture processing we suppose that the processing of semantics decoded from speech and iconic gesture input,

respectively, depends on a common network of left-lateralized inferior frontal regions (especially BA 45, 47) and posterior temporal regions (MTG, ITG). To test this hypothesis, we conducted a functional imaging study that investigated the neural convergence sites of the processing of spoken semantics and iconic gesture semantics in the human brain. We used multiple baseline conditions to optimize interpretation of the functional imaging data [40], i.e. we contrasted familiar speech (German) to an unknown language (Russian) and compared meaningful iconic gestures depicting shapes or movements to equally complex but very diffuse arm and hand movements.

## Methods

### Ethics Statement

All subjects gave written informed consent prior to participation in the study. The study was approved by the local ethics committee.

### Participants

Eighteen healthy male subjects participated in the study. Due to excessive head movement two subjects had to be excluded. The mean age of the remaining 16 subjects was 28.8 years (SD: 8.3, range 23.0–55.0). All participants were right handed [41], native German speakers and had no knowledge of Russian. All subjects had normal or corrected-to-normal vision, none reported any hearing deficits. Exclusion criteria were a history of relevant medical or psychiatric illness of the participants or in his first degree relatives.

### Stimulus Material

The details of the stimulus production are further described in Green et al. (2009). For the current analysis a set of (32 per condition  $\times$  4 conditions (out of 8, see [25]  $\times$  4 sets) short video clips depicting an actor was used: 1) German sentences without gestures [S+], 2) Russian sentences without gestures [S–], 3) iconic gestures without speech [G+], and 4) less meaningful control gestures without speech [G–] (Figure 1). Thus, we presented videos with isolated speech or isolated gesture elements, both of them in either a high meaning or a low meaning variety.

We decided to contrast familiar speech (German) to speech in an unknown language (Russian) as a high level baseline contrast. By doing so we were able to subtract out all those activations related to sublexical processing, but nevertheless presented natural speech. All sentences had a similar grammatical structure (subject – predicate – object) and were translated into Russian. Words that sounded similar in each language were avoided. Examples for the German sentences are: ‘The fisherman has caught a **huge** fish’ (“Der Angler hat einen großen Fisch gefangen”), ‘The cottage is on a very **high** mountain’ (“Die Hütte ist auf einem sehr hohen Berg”) or ‘The table in the kitchen is **round**’ (“Der Tisch in der Küche ist rund”). Thus, the sentences had a similar length of five to eight words and a similar grammatical form, but differed considerable in content. The corresponding gestures (keyword indicated in bold) had to match McNeill’s definition of ‘iconic gestures’ in that they illustrated the form, size or movement of something concrete that is usually mentioned in speech [42]. For each meaningful gesture we developed a diffuse gesture, which was comparable in complexity and movement characteristics but contained no semantic information.

The same male bilingual actor (German and Russian) performed all the utterances and gestures in a natural spontaneous way. Intonation, prosody and movement characteristics in the corresponding variations of one item were closely matched. At the beginning and the end of each clip the actor stood with arms

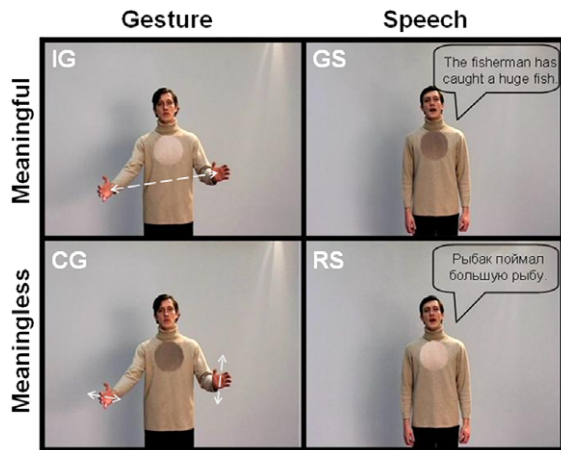

**Figure 1. Design with examples of the meaningful (iconic gesture: G+; german sentence: S+) and meaningless (control gesture: G-; russian sentence: S-) speech and gesture video stimuli.** The stimulus material consisted of video clips of an actor either speaking or performing gestures (exemplary screenshots). Speech bubbles (translations of the original German sentence “Der Fischer hat einen großen Fisch gefangen”) are inserted for illustrative purposes only. Note the dark- and light-colored spots on the actor’s sweater that were used for the control task. The actor displayed in the photograph has given written informed consent to the publication of his photograph.  
doi:10.1371/journal.pone.0051207.g001

hanging comfortably. Each clip had a duration of 5 s including 500 ms before and after the experimental manipulation, where the actor neither speaks nor moves. In the present study the semantic aspects of the stimulus material refer to differences between iconic versus meaningless gestures (without speech) and German versus Russian sentences (without gestures).

For stimulus validation, 20 participants not taking part in the fMRI study rated each video on a scale from 1 to 7 on understandability, imageability and naturalness (1 = very low to 7 = very high). In order to assess understandability participants were asked: How understandable is the video clip? (original: “Wie VERSTÄNDLICH ist dieser Videoclip?”). The rating scale ranged from 1 = very difficult to understand (sehr schlecht verständlich) to 7 = very easy/good to understand (sehr gut verständlich). For naturalness ratings the participants were asked: How natural is the scene? (original: “Wie NATÜRLICH ist diese Szene?”). The rating scale ranged from 1 = very unnatural (sehr unnatürlich) to 7 = very natural (sehr natürlich). Finally, for judgements of imageability the participants were asked: How pictorial/imageable is the scene? (original: “Wie BILDHAFT ist dieser Videoclip?”). The rating scale ranged from 1 = very abstract (sehr abstrakt) to 7 = very pictorial/imageable (sehr bildhaft). These scales have been used in previous investigations, too [25–28,39,43,44]. Other parameters such as movement characteristics, pantomimic content, transitivity or handedness were coded by two of the authors (B.S., A.G.). A set of 1024 video clips (128 German sentences with iconic gestures and their counterparts in the other seven conditions) were chosen as stimuli for the fMRI experiment on the basis of high naturalness and comparability of movement characteristics (across conditions), as well as high understandability for the German conditions. The stimuli were divided in four sets in order to present each participant with 256 clips during the scanning procedure (32 items per condition), counterbalanced across subjects. Across subjects each item was presented in all four conditions but a single

participant only saw complementary derivatives of one item, i.e. the same sentence or gesture information was only presented once per participant. This was done to prevent from speech or gesture repetition or carryover effects. Again, all parameters listed above were used for an equal assignment of the video clips to the four experimental sets, to avoid set-related between-subject differences.

The ratings on understandability for the four conditions used in this study clearly show the intended main effect of meaning, with the meaningful varieties scoring higher than the control varieties ( $F(1,508) = 3925.93$ ,  $P < 0.001$ , partial-eta-squared = 0.885; two-factorial within-subjects ANOVA). Video clips with German speech scored higher than 6 and Russian sentences scored lower than 3 on understandability ( $S+ m = 6.59$ ,  $SD = 0.18$ ;  $S- m = 1.19$ ,  $SD = 0.22$ ;  $S+ > S-: T(254) = 214.104$ ,  $P < 0.001$ ). Concerning the gestures this difference was less strongly pronounced but still present ( $G+ m = 3.12$ ,  $SD = 0.89$ ;  $G- m = 2.25$ ,  $SD = 0.64$ ;  $G+ > G-: T(254) = 8.972$ ,  $P < 0.001$ ). In addition to the main effect of meaning, we also revealed a main effect of modality (Speech > Gesture;  $F(1,508) = 580.17$ ,  $P < 0.001$ , partial-eta-squared = 0.533) as well as an interaction ( $F(1,508) = 2038.44$ ,  $P < 0.001$ , partial-eta-squared = 0.801), indicating that the difference between  $S+$  and  $S-$  is more pronounced than the difference  $G+$  vs.  $G-$ . These results are in line with the assumption that when presented without the respective sentence context isolated iconic gestures are less meaningful, but even then they still transport more meaning than the control gestures, indicating that our manipulation was effective.

The meaningful varieties scored higher than the control varieties in the rating of naturalness ( $F(1,508) = 467.02$ ,  $P < 0.001$ ; main effect; partial-eta squared = 0.479). Post-hoc tests indicated that the meaningful varieties were perceived as equally natural, whereas all other comparisons revealed significant differences (all  $P < 0.001$ ;  $S+ m = 3.61$ ,  $SD = 0.33$ ;  $S- m = 2.67$ ,  $SD = 0.21$ ;  $G+ m = 3.59$ ,  $SD = 0.60$ ;  $G- m = 2.88$ ,  $SD = 0.47$ ). In addition to the main effect of naturalness, we also revealed a main effect of modality ( $F(1,508) = 6.172$ ,  $P < 0.013$ ; partial-eta-squared = 0.012), indicating gesture stimuli scored higher than speech stimuli in the rating of naturalness. Finally we obtained interaction between modality and meaning ( $F(1,508) = 8.98$ ,  $P < 0.003$ ; partial-eta squared = 0.017). The rather low naturalness ratings may be explained by the fact that isolated speech or gesture segments are relatively uncommon in daily life.

Imageability ratings indicated that there were also differences between the conditions concerning their property to evoke mental images. Again the meaningful varieties scored higher than the control varieties ( $F(1,508) = 2081.46$ ,  $P < 0.001$ ; all post-hoc tests significant at  $P < 0.001$ ; partial-eta squared = 0.804). Highest imageability was assigned to German speech and the lowest to Russian speech ( $S+ m = 4.33$ ,  $SD = 0.30$ ;  $S- m = 1.17$ ,  $SD = 0.14$ ;  $G+ m = 3.78$ ,  $SD = 0.77$ ;  $G- m = 2.89$ ,  $SD = 0.56$ ). Thus, we obtained also a main effect modality ( $F(1,508) = 173.131$ ,  $P < 0.001$ ; main effect; partial-eta-squared = 0.254), indicating gesture stimuli scored higher than speech stimuli in the rating of imageability, and an interaction between modality and meaning ( $F(1,508) = 653.833$ ,  $P < 0.001$ ; partial-eta squared = 0.563).

The sentences had an average speech duration of 2269 ms ( $SD = 383$  ms), with German sentences being somewhat longer than Russian sentences ( $S+ m = 2330$  ms,  $SD = 343$  ms;  $S- m = 2208$  ms,  $SD = 413$  ms;  $F(1,254) = 6.619$ ,  $P < 0.05$ ; partial-eta squared = 0.025). The gestures analyzed here had an average gesture duration of 2770 ms ( $SD = 462$  ms) and did not differ between meaningful and diffuse gestures ( $G+ m = 2755$  ms,  $SD$

= 475 ms;  $G^-$   $m = 2784$  ms,  $SD = 449$  ms;  $F(1,254) = 0.237$ ,  $P = 0.627$ ).

Events for the fMRI statistical analysis were defined in accordance with the bimodal conditions (reported in [25]) as the moment with the highest semantic correspondence between speech and the gesture stroke (peak movement): Each sentence contained only one element that could be illustrated, which was intuitively done by the actor. The events occurred on average 2142 ms ( $SD = 538$  ms) after the video start and were used for the modulation of events in the event-related fMRI analysis. The use of these predefined integration time points (reported in [25]) for the fMRI data analysis has the advantage that the timing for all conditions of one stimulus is identical since conditions were counterbalanced across subjects.

### fMRI data acquisition

All MRI data were acquired on a Philips Achieva 3T scanner. Functional images were acquired using a T2-weighted echo planar image sequence ( $TR = 2$  seconds,  $TE = 30$  ms, flip angle  $90^\circ$ , slice thickness 3.5 mm with a 0.3-mm interslice gap,  $64 \times 64$  matrix, FoV 240 mm, in-plane resolution  $3.5 \times 3.5$  mm, 31 axial slices orientated parallel to the AC-PC line covering the whole brain). Four runs of 330 volumes were acquired during the experiment. The onset of each trial was synchronized to a scanner pulse.

### Experimental design and procedure

An experimental session comprised 256 trials (32 for each condition) and consisted of four 11-minute blocks. Each block contained 64 trials with a matched number of items from each condition. The stimuli were presented in an event-related design in pseudo-randomized order and counterbalanced across subjects. As described above (stimulus material) across subjects, each item was presented in all conditions but a single participant only saw complementary derivatives of one item, i.e. the same sentence or gesture information was only seen once per participant. This was done to prevent speech or gesture repetition or carry over effects. Each clip was followed by a fixation cross on grey background with a variable duration of 3750 ms to 6750 ms (average: 5000 ms).

Before scanning, each participant received at least 10 practice trials outside the scanner, which were different from those used in the main experiment. Before the experiment started, the volume of the videos was individually adjusted so that the clips were clearly audible. During scanning, participants were instructed to watch the videos and to indicate via left hand key presses at the beginning of each video whether the spot displayed on the actor's sweater was light or dark. This task enabled us to investigate implicit speech and gesture processing without possible instruction-related attention biases. Performance rates and reaction times were recorded.

### MRI data analysis

MR images were analyzed using Statistical Parametric Mapping standard routines and templates ([www.fil.ion.ucl.ac.uk](http://www.fil.ion.ucl.ac.uk)). After discarding the first five volumes to minimize T1-saturation effects, all images were spatially and temporally realigned, normalized (resulting voxel size  $4 \times 4 \times 4$  mm<sup>3</sup>), smoothed (10 mm isotropic Gaussian filter) and high-pass filtered (cut-off period 128 s).

Statistical whole-brain analysis was performed in a two-level, mixed-effects procedure. In the first level, single-subject BOLD responses were modeled by a design matrix comprising the onsets of each event (see stimulus material) of all eight experimental conditions. The hemodynamic response was modeled by the canonical hemodynamic response function (HRF) and its temporal derivative. The volume of interest was restricted to grey matter voxels by use of an inclusive mask created from the segmentation

of the standard brain template. Parameter estimate ( $\beta^-$ ) images for the HRF were calculated for each condition and each subject. As SPM5 provides optimized second level models we used SPM5 for a random-effects group analysis. Parameter estimates for the four relevant conditions were entered into a within-subject one-way flexible factorial ANOVA. The semantic aspects of language processing were isolated computing the difference contrast of German versus Russian sentences [ $S+>S-$ ], whereas the semantic aspects of action processing were revealed by contrasting meaningful gestures against control gestures [ $G+>G-$ ]. Both these contrasts were inclusively masked by their minuends to ensure that only differences with respect to the activations of the first condition are evaluated.

In order to show areas that are shared by both processes, both these contrasts were entered into a conjunction analysis [ $S+>S- \cap G+>G-$ ], testing for independently significant effects compared at the same threshold (conjunction null, see [45]). This conjunction was inclusively masked by [ $S+ > baseline$ ] and [ $G+ > baseline$ ].

Areas activated to a stronger degree for the processing of gesture semantics as opposed to speech semantics were revealed by an interaction analysis [ $(G+>G-) > (S+>S-)$ ], inclusively masked with ( $G+>G-$ ) and ( $G+ > baseline$ ). Correspondingly, areas activated to a stronger degree for the processing of speech semantics as opposed to gesture semantics were revealed by the following interaction contrast [ $(S+>S-) > (G+>G-)$ ], inclusively masked with ( $S+>S-$ ) and ( $S+ > baseline$ ). The masking procedure was applied to ensure that differences between conditions are not a result of deactivation in a given contrast. Thus, all reported results reflect real activation increases with regard to the low level baseline (fixation cross).

We chose to employ Monte-Carlo simulation of the brain volume to establish an appropriate voxel contiguity threshold [46]. This correction has the advantage of higher sensitivity to smaller effect sizes, while still correcting for multiple comparisons across the whole brain volume. Assuming an individual voxel type I error of  $P < 0.05$ , a cluster extent of 29 contiguous resampled voxels was indicated as necessary to correct for multiple voxel comparisons at  $P < 0.05$ . This cluster threshold (based on the whole brain volume) has been applied to all contrasts and consequently is not affected by the masking procedure reported above. The reported voxel coordinates of activation peaks are located in MNI space. For the anatomical localization the functional data were referenced to probabilistic cytoarchitectonic maps [47].

## Results

### Behavioral Results

The average reaction time for the control task ("indicate the color of the spot on the actor's sweater") did not differ across colors ( $F(1,15) = 0.287$ ,  $P < 0.600$ ) and conditions ( $F(3,45) = 1.983$ ,  $P < 0.174$ , within-subjects ANOVA;  $m = 1.24$  sec,  $SD = 0.96$ ). The participants showed an average accuracy rate of 99% which did not differ across conditions ( $F(3,45) = 0.508$ ,  $P = 0.619$ , within-subjects ANOVA). Thus, the attention control task indicates that participants did pay attention to the video clips.

### fMRI results

Analyses targeting at within-modality semantic processing showed that language-related semantics as revealed by the contrast [ $S+>S-$ ] were processed in a mainly left-lateralized network encompassing an extended frontotemporal cluster (inferior frontal gyrus, precentral gyrus, middle, inferior and superior temporal gyrus) as well as SMA in the left hemisphere and the right middle temporal gyrus (Table 1 and Figure 2a).

**Table 1.** Regions activated for familiar versus unfamiliar language [S+>S-] and for meaningful iconic versus control gestures [G+>G-].

| Peak location                       | Cluster extension                                           | BA            | x   | y   | z   | t-value | Extent |
|-------------------------------------|-------------------------------------------------------------|---------------|-----|-----|-----|---------|--------|
| <i>Speech semantics [S+&gt;S-]</i>  |                                                             |               |     |     |     |         |        |
| L MTG                               | STG, ITG, Hipp/Amyg                                         | 20, 21, 38    | -64 | -52 | 0   | 6.78    | 922    |
| L IFG                               | preCG, MFG                                                  | 6, 9, 44, 45  | -44 | 12  | 24  | 6.18    |        |
| R MTG                               | ITG                                                         | 21, 37        | 60  | -40 | -4  | 3.49    | 153    |
| L SFG                               | SMA                                                         | 6             | -8  | 20  | 48  | 2.98    | 37     |
| <i>Gesture semantics [G+&gt;G-]</i> |                                                             |               |     |     |     |         |        |
| L/R Paracentral cortex              | SMA, paracentral lobule, preCG, poCG, ACC, midCC, MFG       | 6, 3ab, 2, 4a | -4  | -8  | 72  | 4.50    | 1.772  |
| L IFG                               | temporal pole, insula, Amyg                                 | 44, 45        | -32 | 28  | -8  | 4.22    |        |
| L Parietal cortex                   | SPL, IPL, supra-marginal/angular gyrus, precuneus, MOG, SOG | 7, 5          | -56 | -40 | 40  | 3.74    |        |
| R Temporal Pole                     | insula, putamen, Hipp                                       |               | 36  | 8   | -28 | 4.49    | 370    |
| R IFG                               | IFG, MOrbG                                                  | 44, 45        | 48  | 36  | -16 | 2.82    |        |
| L Fusiform Gyrus                    | ITG, IOG, Hipp                                              |               | -32 | -28 | -24 | 3.72    | 355    |
| L/R Basal ganglia                   | Thalamus, Pallidum, CN                                      |               | -8  | -24 | 0   | 3.41    |        |
| L Rectal Gyrus                      |                                                             |               | -8  | 16  | -20 | 3.23    |        |
| R ITG                               | ITG, PHG, Hipp, FusifG                                      |               | 28  | -20 | -24 | 3.98    | 144    |
| R Supramarginal gyrus               | IPL, operculum, poCG                                        | 1, 3b, 40, 43 | 56  | -36 | 40  | 3.34    | 139    |
| R MFG                               | prCG                                                        |               | 40  | 12  | 56  | 3.25    | 41     |
| R SFG                               | SFG                                                         |               | 20  | 60  | 28  | 3.12    | 34     |
| R FusifG                            | CalcG,                                                      | V3, BA 17/18  | 28  | -80 | -12 | 2.77    | 32     |

Note: Stereotactic coordinates in MNI space and t-values of the foci of maximum activation (P<0.05 corrected). Abbreviations: ACC=anterior cingulate cortex, Amyg = Amygdala, CalcG = calcarine gyrus, CN = caudate nucleus, FusifG = fusiform gyrus, Hipp = Hippocampus, IFG = inferior frontal gyrus, IOG = inferior occipital gyrus, IPL = inferior parietal lobule, ITG = inferior temporal gyrus, MFG = Middle frontal gyrus, midCC = middle cingulate cortex, MOG = middle occipital gyrus, MOrbG = middle orbital gyrus, PHG = parahippocampal gyrus, preCG = precentral gyrus, poCG = postcentral gyrus, SFG = superior frontal gyrus, SMA = supplementary motor area, SOG = superior occipital gyrus, SPL = superior parietal lobule STG = superior temporal gyrus.  
doi:10.1371/journal.pone.0051207.t001

Gesture-related semantics [G+>G-], in contrast, recruited a widely distributed bilateral network of regions (see Table 1 and Figure 2b).

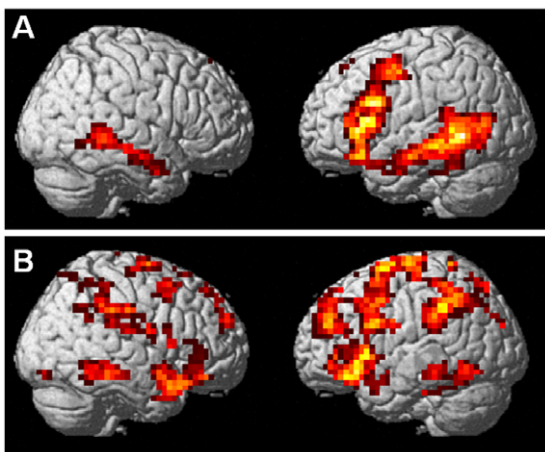

**Figure 2.** Within-modality semantic processing for speech (A; S+>S-) and iconic gestures (B; G+>G-).  
doi:10.1371/journal.pone.0051207.g002

**Common activations for semantics contained in iconic gestures and spoken language**

Semantic processing independent of input modality as disclosed by the conjunction of [S+>S- ∩ G+>G-] was related to a left-sided frontal cluster (extending from inferior frontal gyrus (BA 44, 45) across middle frontal gyrus and precentral gyrus), left inferior temporal cortex and right middle temporal gyrus (363 voxels; Table 2 and Figure 3).

**Interaction analyses: Activation differences between gesture and speech semantics**

Speech semantics elicited significantly stronger activations than gesture semantics [(S+>S-) > (G+>G-)] along the left middle temporal gyrus and in the left inferior frontal gyrus (pars triangularis, BA 44, 45; 291 voxels; Table 3 and Figure 4A).

The inverted contrast [(G+>G-) > (S+>S-)] revealed that gesture semantics activated a more widespread bilateral network, comprising superior and inferior parietal regions, superior frontal and medial areas, right temporal pole and left insula (Table 3 and Figure 4B than speech semantics).

**Discussion**

We hypothesized that the semantic processing of spoken language and iconic gestures is based on a common neural network. Our study design tailored the comparison to the level of semantics, controlling for lower processing levels such as sound

**Table 2.** Regions activated for both speech and gesture semantics ( $[S+>S-] \cap [G+>G-]$ ).

| Peak location | Cluster extension         | BA        | x   | y   | z   | t-value | Extent |
|---------------|---------------------------|-----------|-----|-----|-----|---------|--------|
| L IFG         | MFG, preCG, temporal pole | 6, 44, 45 | -40 | 28  | -16 | 3.83    | 258    |
| L ITG         | MTG/FusifG                | 20, 21,37 | -60 | -36 | -16 | 3.06    | 75     |
| R MTG         |                           | 20, 21,37 | 60  | -36 | -8  | 2.47    | 30     |

Note: Stereotactic coordinates in MNI space and *t*-values of the foci of maximum activation ( $P < 0.05$  corrected). Abbreviations: FusifG = fusiform gyrus, IFG = inferior frontal gyrus, ITG = inferior temporal gyrus, MFG = middle frontal gyrus, MTG = middle temporal gyrus, preCG = precentral gyrus.  
doi:10.1371/journal.pone.0051207.t002

and motion kinematics. Thus, this study was basically focused on the feature extraction level of the feature integration model [35]. The results demonstrate that the pathways engaged in the processing of semantics contained in both spoken language and iconic gestures comprise the left IFG, the left inferior temporal and the right middle temporal gyrus. Thus, in line with our hypothesis we found modality-independent activation in a bilateral fronto-temporal network with a leftwards asymmetry.

### Processing of speech semantics

The results of the speech contrast  $[S+>S-]$  are in line with other studies that contrasted the processing of a native against an unknown foreign language [48–50]. We found activation along the left temporal lobe (including STG, MTG and ITG), in the LIFG extending into the precentral gyrus, and along the right MTG. This strongly left-lateralized pattern has been found in all of the above mentioned studies. Apart from these studies with conditions very similar to our study, temporal as well as inferior frontal regions have been frequently implicated in various kinds of language tasks (for reviews see [1,2,51]). For the LIFG Hagoort (2005) identified an anterior-ventral to posterior-dorsal gradient, with BA 47 and BA 45 contributing to semantic processing, BA 45 and BA 44 processing syntactics and BA 44 and parts of BA 6 playing a role in phonological processing [52] – all of these regions have been revealed by our  $[S+>S-]$  contrast. Most likely this contrast uncovers not only activation related to semantic, but also to syntactic (as the syntax of Russian speech could not be evaluated by our subjects) and phonological processing (as the speech sounds of Russian language are different from those of German language). The temporal regions found in our analysis have been related to the storage and retrieval of linguistic information, specifically for semantic information (see e.g., [53–55]). These temporal semantic regions have been shown to consist of category-specific and spatially separable subdivisions, with regions relating to persons, animals or tools (for a review see [1]).

These fronto-temporal areas classically associated with language processing seem to be stronger activated by speech semantics than

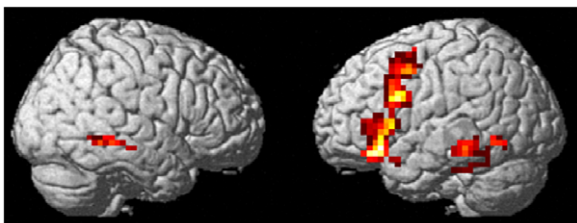

**Figure 3.** Common areas of activation for the processing of semantics derived from speech and iconic gestures ( $S+>S- \cap G+>G-$ ).  
doi:10.1371/journal.pone.0051207.g003

by semantics evoked by gestures as indicated by our interaction analysis. Within this analysis we found that processing of speech semantics in contrast to gesture semantics relied on frontal (LIFG) and temporal regions (MTG). Thus, despite the finding of a supramodal network including especially left inferior frontal and posterior temporal regions (see below), parts of these regions are more involved in the processing of speech semantics in contrast to gesture semantics.

### Processing of gesture semantics

In line with studies on action observation (e.g., [22,56–58]) we found for the processing of gesture semantics a bilaterally distributed network of activation including the premotor cortex, inferior and middle frontal gyri, inferior temporal gyrus and parietal regions.

However, the semantic aspects of the iconic gestures used in the present study differed from all previous studies with regard to the type of information and the specificity of the presented content: Previous studies have either presented pantomimes of tool or object use, hands grasping for tools or objects (e.g., [22,56–65]) or have shown symbolic gestures like “thumbs up” [21,66–68]. Our stimuli in contrast consisted of iconic gestures that normally are used to accompany speech (e.g., [19,25,69–72]). Thus, compared to symbolic gestures, iconic gestures are less clear in their meaning when presented without speech. Despite these differences in stimuli we found a similar network of activations as in a previous study [21], suggesting that even ambiguous gesture information activates semantic representations. The remarkable distributed activation pattern in our study most likely is due to this more diffuse meaning, reflecting enhanced decoding processing effort to enable understanding. However, our findings provide a first support for the assumption that some aspects of semantic information are extracted from iconic gestures already at the feature extraction level [35].

Interaction contrasts revealed that processing of the less apparent gesture meaning compared to speech semantics engaged a broader network that included parietal regions, superior frontal regions and sensorimotor areas. All of these areas have previously been related to action processing (e.g., [56,59,60,63,73–77]) and seem to process semantics derived from gestures.

### Supramodal semantic processing

The processing of spoken language semantics and semantic information conveyed through iconic gestures activated an overlapping network of brain regions including the left inferior frontal cortex (BA 44, 45) expanding into the precentral gyrus (BA 4, 6), the left inferior temporal gyrus (BA 37) and a smaller cluster in the right middle temporal gyrus, suggesting the existence of a supramodal semantic network.

These results extend studies from both the gesture and the language domain (see above) in showing a common neural

**Table 3.** Regions activated specifically for speech and gesture semantics.

| Peak location                                                             | Cluster extension                            | BA            | x   | y   | z   | t-value | Extent |
|---------------------------------------------------------------------------|----------------------------------------------|---------------|-----|-----|-----|---------|--------|
| <i>Speech semantic &gt; gesture semantic ([S+&gt;S-] &gt; [G+&gt;G-])</i> |                                              |               |     |     |     |         |        |
| L MTG                                                                     | ITG, MOG                                     | 21,20, 19,37  | -60 | -52 | 0   | 4.85    | 195    |
| L IFG                                                                     | IFG                                          | 45            | -48 | 28  | 4   | 3.32    | 96     |
| <i>Gesture semantic &gt; Speech semantic ([G+&gt;G-] &gt; [S+&gt;S-])</i> |                                              |               |     |     |     |         |        |
| L/R SPL                                                                   | Precuneus, SMA, midCC, SOG, preCG, poCG, IPL | 2, 3, 5, 6, 7 | -12 | -64 | 60  | 4.21    | 549    |
| R Insula                                                                  | STG, IFG, Hipp, Putamen, Pall                | 44, 38,47     | 36  | 12  | -24 | 4.47    | 260    |
| L IPL                                                                     | Angular-/supramarginal gyrus                 | 7, 40         | -48 | -44 | 40  | 4.37    | 133    |
| L SFG                                                                     | MFG                                          | 9, 10, 46     | -24 | 52  | 40  | 5.56    | 113    |
| L Parahippo-campal gyrus                                                  | Thalamus                                     |               | -24 | -40 | -8  | 3.92    | 110    |
| R Supramarginal gyrus                                                     |                                              | 40            | 56  | -40 | 44  | 5.52    | 80     |
| R/L Medial cluster                                                        | SIG, ACC                                     | 8, 32         | 4   | 44  | 44  | 3.32    | 63     |
| L N.A.                                                                    | olfactory cortex/Hypothalamus                |               | -8  | 4   | -12 | 3.75    | 40     |
| R SFG                                                                     |                                              | 10            | 24  | 48  | 20  | 5.33    | 33     |
| L Insula                                                                  |                                              |               | -36 | 8   | 4   | 3.10    | 30     |

Note: Stereotactic coordinates in MNI space and t-values of the foci of maximum activation ( $P < 0.05$  corrected). Abbreviations: IFG = inferior frontal gyrus, IPL = inferior parietal lobule, ITG = inferior temporal gyrus, midCC = middle cingulate cortex, MOG = middle occipital gyrus, MTG = middle temporal gyrus, preCG = precentral gyrus, poCG = postcentral gyrus, SMA = supplementary motor area, SOG = superior occipital gyrus, SPL = superior parietal lobule, STG = superior temporal gyrus, N.A. = Not assigned.

doi:10.1371/journal.pone.0051207.t003

representation of speech and iconic gesture semantics. Furthermore, the findings go beyond previous reports about common activation between symbolic gestures and speech semantics [21], in showing comparable effects for less conventionalized and less language like iconic gestures. However, differences in the subregions of the left IFG and posterior temporal lobe between the present findings and results for symbolic gestures [21], suggest an specific involvement of the motor-cortex and the more inferior part of the temporal lobe in the processing of iconic gesture and speech semantics. These results suggest a high flexibility of the supramodal network, recruiting specific subregions of the left IFG and posterior temporal lobes dependent on content and specificity of communicated meaning. The left-lateralization of our findings is congruent with the majority of fMRI studies on language (see

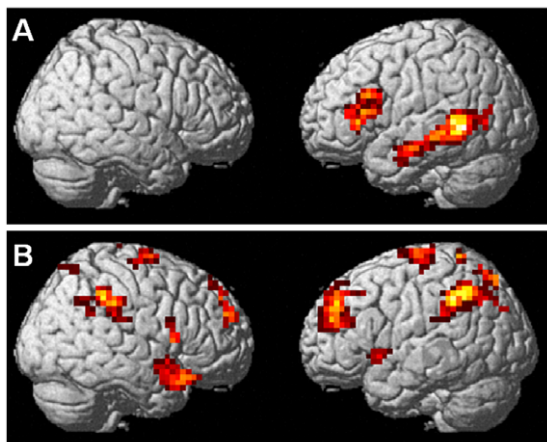

**Figure 4. Stronger activations for speech semantics than gesture semantics (A; [S+>S-] > [G+>G-]) and vice versa (B; [G+>G-] > [S+>S-]).**

doi:10.1371/journal.pone.0051207.g004

[1,51], for reviews). But the right hemisphere makes substantial contributions to communication such as keeping track of the topic or drawing inferences from utterances [3,78]. Left fronto-temporal activations have been frequently observed for semantic processing (e.g., [79]; for a review see [2]), for the decoding of meaningful actions (e.g., [22,58]) and also with regard to co-verbal gesture processing [26,28–32].

With regard to the inferior frontal activations, functional imaging studies have underlined the importance of this region in the processing of language semantics. The junction of the precentral gyrus and the pars opercularis of the LIFG has been involved in controlled semantic retrieval [80–82], semantic priming [83–88] and a supramodal network for semantic processing of words and pictures [83]. The middle frontal gyrus (MFG) was found activated by intramodal semantic priming (e.g., [89]) and the right inferior frontal gyrus demonstrated response suppression in crossmodal semantic priming [83]. In addition, knowledge relating to manipulable objects has repeatedly been located in the precentral gyrus (for reviews, see [90,91]). Studies on gesture processing constantly have found Broca's area/LIFG/ventral premotor cortex stronger activated for meaningful (e.g. transitive pantomimes) compared to meaningless gestures (see meta-analysis by [58]). Fadiga and colleagues (2006) have demonstrated that the activation of the classic motor speech centre in action observation is genuine and not due to verbalization processes [92]. The activations that we observed in the inferior and middle temporal gyrus most likely reflect the retrieval of conceptual information derived from both information channels. A meta-analysis of 120 functional imaging studies by Binder and colleagues (2009) recapitulated that the posterior temporal cortex constitutes a multimodal and heteromodal association cortex. Especially the posterior proportions have been found activated irrespective of whether the stimuli (e.g., objects) were presented as pictures, written or spoken language [93]. We found a more inferior region of the temporal lobe and not the angular gyrus to be activated by speech and gesture semantics.

The angular gyrus, however, seems to be more involved in the processing of gesture semantics [G+>G- > S+>S-]. Thus, our results suggest that stimulus triggered semantic processes that are common to the speech and gesture domain might rather rely on inferior frontal and inferior/middle temporal brain regions. In line with the mentioned meta-analysis, these regions seem also to have supramodal properties (i.e., are activated by semantic tasks across visual and auditory modalities [93]).

Since semantic memory is the basis of semantic processing, an amodal semantic memory [94] is a likely explanation for how speech and gesture could activate a common neural network. Our findings suggest supramodal semantic processing in regions including the left temporal pole, which has been described as best candidate for a supramodal semantic “hub” [94]. Thus, semantic information contained in speech and gestures might have activated supramodal semantic knowledge in our study. Importantly, despite subjects performed a non-semantic control task (pressing one of two buttons, depending on the color of the spot on the sweater), we found that speech and gesture semantics (meaningful > meaningless) were processed in overlapping neural structures. This indicates that features of speech and gesture are able to trigger semantic processing/knowledge (bottom up). An alternative explanation for our findings could stem from differences in familiarity between conditions. However, contrarily to this assumption is the fact that familiarity usually leads to reduced neural responses in contrast to novel/unfamiliar or mismatching information (e.g. for action observation [95], speech or co-verbal gesture processing [25,29]). Thus, an opposite pattern of activation (meaningless/unfamiliar > meaningful/familiar) would be expected based on differences in familiarity.

Our results are extending the findings of Xu and colleagues (2009) who examined symbolic gestures and their spoken analogies and identified the left posterior MTG and superior temporal sulcus, the left IFG and the right posterior MTG as areas of common activation [21]. The high consistence in results between our and their study is remarkable, considering the different kinds of stimuli used: Whereas Xu and co-workers used highly conventionalized gestures and pantomimes often including prompts to the viewer (“settle down!”, “thumbs up”), we used non-conventionalized iconic gestures that are used only in combination with speech and describe properties of actions or objects. Symbolic stimuli like the emblems used in the Xu study bear no formal relationship with the content of the utterance they accompany; their meaning is clear-cut and highly overlearned. Thus, it is not surprising that such a learned meaning is represented in a neural network overlapping with the corresponding language representations.

In our study the gestures’ meaning was less specific and novel to the participants, but still activated brain regions overlapping with the processing of speech semantics. Thus, our findings provide a first support for the assumption that at least some aspects of semantic information are extracted from iconic gestures already at the feature extraction level [35]. Additional resources required for a more intensive search for meaning might explain the activation of the precentral gyrus present in our, but not in the Xu study. Thus, activation of the motor cortex might be relevant for extracting meaning of complex movements with unspecific meaning. It might as well be possible that isolated hand gestures without a clear meaning are initially interpreted as relating to any kind of object manipulation, as this is what our hands are made for. It is well known that object knowledge also includes associations with sensorimotor correlates of their use, i.e. motor programs stored in pericentral regions. This explanation would be indicative of a common origin of motor behavior and semantic

knowledge. Concerning the speech stimuli there was another difference between the two studies: While Xu et al. used words and digitally modified pseudowords we presented short sentences and their translations into Russian, i.e. we used more complex and, importantly, in the control condition more natural stimuli. Thus, differences in activation pattern between studies might be due to these differences in control conditions.

In addition to the differences in frontal activation our results also suggest a more inferior part of the posterior temporal lobe (compared to results of Xu et al.) to be involved in the common semantic network identified for iconic gestures and concrete speech. Left inferior and middle temporal activations have been reported for meaningful speech comprehension [51] and semantic retrieval [93]. Furthermore, the inferior temporal gyrus has been found for amodal semantic processing [96] and the maintenance of conceptual information [8]. Thus, depending on gesture type (iconic vs. emblematic) different aspects of supramodal semantic processes seem to be involved in extracting meaning from speech and gesture. Future studies are necessary to disentangle the function of inferior and superior aspects of the posterior temporal lobe in the processing of semantic information contained in emblematic and iconic gestures.

## Implications

In the past, all of the revealed areas have been related to the network associated with different aspects of language comprehension. All of them have been shown part of a network contributing to semantic processing of written, spoken and signed language, for example by lexical storage and access (MTG, ITG), retrieval and selection of lexical information (IFG) (see [97], for review). The interplay of these regions enables the integration of different representations into a continuously developing semantic context – independent of modality. Our results support the hypothesis that these former findings are not limited to language, be it written, spoken or signed. We could demonstrate activation of a supramodal network for speech semantics and unspecific and hard to verbalize iconic gestures semantics. The identified fronto-temporal network maps not only sound and meaning in the auditory domain but also combines gestures and their meanings in the gestural-visual domain. This modality-independent network most likely gets input from modality-specific areas in the superior (speech) and inferior temporal lobe (gestures) where the main characteristics of the spoken and gestured signals are decoded. The inferior frontal regions are responsible for the process of selection and integration, relying on more general world knowledge distributed throughout the brain [21].

This is somewhat contradictory to studies on speech gesture integration where the left IFG has not been found consistently [25,28,31,32]. These studies rather suggest that the role of the IFG in speech gesture integration processes is not purely integrative but rather related to the detection and resolution of incompatible stimulus representations (as in mismatch designs like [29]) and for implementing reanalyses in the face of misinterpretations [98,99]. This explanation might also account for IFG involvement in the processing of metaphoric speech-gesture pairs where the speech content cannot be taken literally (if it was taken literally there would be conflict between speech and gesture) and has to be transferred to an abstract level [26–28]. Instead, a region at the temporo-occipital junction seems to fulfill the integration of speech and iconic gestures in a natural context [25,27,28,31]. Taken together, for speech gesture processing our results rather assigns the LIFG a semantic-related processing step just before integration.

Our findings also corroborate the theory about the evolutionary origins of human communication [21,100–102]: It is assumed that



a precursor of the here presented fronto-temporal system supported gestural communication by pairing gesture and meaning. As voluntary control over the vocal apparatus evolved and spoken language developed this system was then adapted for the comparable pairing of sound and meaning, keeping its original function in gesture processing [21].

## Conclusion

In the last years the understanding of speech and gesture processing has increased, both communication channels have been disentangled and again were brought together. But so far there had been a “missing link” in the research along the continuum between symbolic gestures, speech-accompanying gestures like iconic gestures and isolated speech. Our study bridges this gap and provides evidence that there is a common and thus amodal neural system for the processing of semantics contained in language and

gestures. The challenge for future studies will be the identification of specific aspects of speech and gesture semantics or the respective format relevant for the understanding of the role of specific subregions of the left IFG and the posterior temporal lobes.

## Acknowledgments

The authors are grateful to all the subjects who participated in this study and to the IZKF service team (Aachen) for support acquiring the data.

## Author Contributions

Conceived and designed the experiments: TK BS AG SW. Performed the experiments: AG BS. Analyzed the data: SW BS AG. Contributed reagents/materials/analysis tools: SW. Wrote the paper: BS AG. Finalized the manuscript: BS AG SW TK.

## References

- Bookheimer S (2002) Functional MRI of language: new approaches to understanding the cortical organization of semantic processing. *Annu Rev Neurosci* 25: 151–188.
- Vigneau M, Beaucousin V, Hervé PY, Duffau H, Crivello F, et al. (2006) Meta-analyzing left hemisphere language areas: phonology, semantics, and sentence processing. *Neuroimage* 30: 1414–1432.
- Vigneau M, Beaucousin V, Hervé PY, Jobard G, Petit L, et al. (2011) What is right-hemisphere contribution to phonological, lexico-semantic, and sentence processing? Insights from a meta-analysis. *Neuroimage* 54: 577–593.
- Obleser J, Meyer L, Friederici AD (2011) Dynamic assignment of neural resources in auditory comprehension of complex sentences. *Neuroimage* 56: 2310–2320.
- Friederici AD, Rüschemeyer SA, Hahne A, Fiebach CJ (2003) The role of left inferior frontal and superior temporal cortex in sentence comprehension: localizing syntactic and semantic processes. *Cereb Cortex* 13: 170–177.
- Vandenbergh R, Nobre AC, Price CJ (2002) The response of left temporal cortex to sentences. *J Cogn Neurosci* 14: 550–560.
- Ni W, Constable RT, Mencl WE, Pugh KR, Fulbright RK, et al. (2000) An event-related neuroimaging study distinguishing form and content in sentence processing. *J Cogn Neurosci* 12: 120–133.
- Fiebach CJ, Friederici AD, Smith EE, Swinney D (2007) Lateral inferotemporal cortex maintains conceptual-semantic representations in verbal working memory. *J Cogn Neurosci* 19: 2035–2049.
- Hickok G, Poeppel D (2004) Dorsal and ventral streams: a framework for understanding aspects of the functional anatomy of language. *Cognition* 92: 67–99.
- Kircher TT, Liddle PF, Brammer MJ, Williams SC, Murray RM, et al. (2001) Neural correlates of formal thought disorder in schizophrenia: preliminary findings from a functional magnetic resonance imaging study. *Arch Gen Psychiatry* 58: 769–774.
- Constable RT, Pugh KR, Berroya E, Mencl WE, Westerveld M, et al. (2004) Sentence complexity and input modality effects in sentence comprehension: an fMRI study. *Neuroimage* 22: 11–21.
- Lindenberg R, Scheef L (2007) Supramodal language comprehension: role of the left temporal lobe for listening and reading. *Neuropsychologia* 45: 2407–2415.
- Holle H, Gunter TC (2007) The role of iconic gestures in speech disambiguation: ERP evidence. *J Cogn Neurosci* 19: 1175–1192.
- Kelly SD, Kravitz C, Hopkins M (2004) Neural correlates of bimodal speech and gesture comprehension. *Brain Lang* 89: 253–260.
- Ozyürek A, Kelly SD (2007) Gesture, brain, and language. *Brain Lang* 101: 181–184.
- Wu YC, Coulson S (2005) Meaningful gestures: electrophysiological indices of iconic gesture comprehension. *Psychophysiology* 42: 654–667.
- Wu YC, Coulson S (2007) Iconic gestures prime related concepts: an ERP study. *Psychon Bull Rev* 14: 57–63.
- Feyerisen P, Van de Wiele M, Dubois F (1988) The meaning of gestures: What can be understood without speech?. *Curr Psychol Cogn* 8: 3–25.
- McNeill D, editor (1992) *Hand and mind: what gestures reveal about thought*. Chicago, IL: University of Chicago Press.
- Emmorey K, Xu J, Braun A (2011) Neural responses to meaningless pseudosigns: evidence for sign-based phonetic processing in superior temporal cortex. *Brain Lang* 117: 34–38.
- Xu J, Gannon PJ, Emmorey K, Smith JF, Braun AR (2009) Symbolic gestures and spoken language are processed by a common neural system. *Proc Natl Acad Sci U S A* 106: 20664–20669.
- Decety J, Grèzes J, Costes N, Perani D, Jeannerod M, et al. (1997) Brain activity during observation of actions. Influence of action content and subject's strategy. *Brain* 120 ( Pt 10): 1763–1777.
- MacSweeney M, Woll B, Campbell R, McGuire PK, David AS, et al. (2002) Neural systems underlying British Sign Language and audio-visual English processing in native users. *Brain* 125: 1583–1593.
- MacSweeney M, Capek CM, Campbell R, Woll B (2008) The signing brain: the neurobiology of sign language. *Trends Cogn Sci* 12: 432–440.
- Green A, Straube B, Weis S, Jansen A, Willmes K, et al. (2009) Neural integration of iconic and unrelated coverbal gestures: a functional MRI study. *Hum Brain Mapp* 30: 3309–3324.
- Kircher T, Straube B, Leube D, Weis S, Sachs O, et al. (2009) Neural interaction of speech and gesture: differential activations of metaphoric coverbal gestures. *Neuropsychologia* 47: 169–179.
- Straube B, Green A, Weis S, Chatterjee A, Kircher T (2009) Memory effects of speech and gesture binding: cortical and hippocampal activation in relation to subsequent memory performance. *J Cogn Neurosci* 21: 821–836.
- Straube B, Green A, Bromberger B, Kircher T (2011) The differentiation of iconic and metaphoric gestures: Common and unique integration processes. *Hum Brain Mapp* 32: 520–533.
- Willems RM, Ozyurek A, Hagoort P (2007) When language meets action: the neural integration of gesture and speech. *Cereb Cortex* 17: 2322–2333.
- Willems RM, Ozyurek A, Hagoort P (2009) Differential roles for left inferior frontal and superior temporal cortex in multimodal integration of action and language. *Neuroimage* 47: 1992–2004.
- Holle H, Gunter TC, Rueschemeyer SA, Hennenlotter A, Iacoboni M (2008) Neural correlates of the processing of co-speech gestures. *Neuroimage* 39: 2010–2024.
- Holle H, Obleser J, Rueschemeyer SA, Gunter TC (2010) Integration of iconic gestures and speech in left superior temporal areas boosts speech comprehension under adverse listening conditions. *Neuroimage* 49: 875–884.
- Dick AS, Goldin-Meadow S, Hasson U, Skipper JL, Small SL (2009) Co-speech gestures influence neural activity in brain regions associated with processing semantic information. *Hum Brain Mapp* 30: 3509–3526.
- Hubbard AL, Wilson SM, Callan DE, Dapretto M (2009) Giving speech a hand: gesture modulates activity in auditory cortex during speech perception. *Hum Brain Mapp* 30: 1028–1037.
- Obermeier C (2011) Exploring the significance of task, timing and background noise on gesture-speech integration (Doctoral dissertation). Leipzig: Max Planck Institute for Human Cognitive and Brain Sciences.
- Holle H, Obermeier C, Schmidt-Kassow M, Friederici AD, Ward J, et al. (2012) Gesture facilitates the syntactic analysis of speech. *Front Psychol* 3: 74.
- Obermeier C, Dolk T, Gunter TC (2011) The benefit of gestures during communication: Evidence from hearing and hearing-impaired individuals. *Cortex*.
- Obermeier C, Holle H, Gunter TC (2011) What iconic gesture fragments reveal about gesture-speech integration: when synchrony is lost, memory can help. *J Cogn Neurosci* 23: 1648–1663.
- Straube B, Green A, Sass K, Kirner-Veselinovic A, Kircher T (2012) Neural integration of speech and gesture in schizophrenia: Evidence for differential processing of metaphoric gestures. *Hum Brain Mapp*.
- Friston KJ, Price CJ, Fletcher P, Moore C, Frackowiak RS, et al. (1996) The trouble with cognitive subtraction. *Neuroimage* 4: 97–104.
- Oldfield RC (1971) The assessment and analysis of handedness: the Edinburgh inventory. *Neuropsychologia* 9: 97–113.
- McNeill D (1992) *Hand and mind: what gestures reveal about thought*. Chicago: Univ. of Chicago Press. XI, 416 S. p.
- Straube B, Green A, Chatterjee A, Kircher T (2011) Encoding social interactions: the neural correlates of true and false memories. *J Cogn Neurosci* 23: 306–324.

44. Straube B, Green A, Jansen A, Chatterjee A, Kircher T (2010) Social cues, mentalizing and the neural processing of speech accompanied by gestures. *Neuropsychologia* 48: 382–393.
45. Nichols T, Brett M, Andersson J, Wager T, Poline JB (2005) Valid conjunction inference with the minimum statistic. *Neuroimage* 25: 653–660.
46. Slotnick SD, Schacter DL (2004) A sensory signature that distinguishes true from false memories. *Nat Neurosci* 7: 664–672.
47. Eickhoff SB, Stephan KE, Mohlberg H, Grefkes C, Fink GR, et al. (2005) A new SPM toolbox for combining probabilistic cytoarchitectonic maps and functional imaging data. *Neuroimage* 25: 1325–1335.
48. Schlosser MJ, Aoyagi N, Fulbright RK, Gore JC, McCarthy G (1998) Functional MRI studies of auditory comprehension. *Hum Brain Mapp* 6: 1–13.
49. Pallier C, Dehaene S, Poline JB, LeBihan D, Argenti AM, et al. (2003) Brain imaging of language plasticity in adopted adults: can a second language replace the first? *Cereb Cortex* 13: 155–161.
50. Perani D, Dehaene S, Grassi F, Cohen L, Cappa SF, et al. (1996) Brain processing of native and foreign languages. *Neuroreport* 7: 2439–2444.
51. Price CJ (2010) The anatomy of language: a review of 100 fMRI studies published in 2009. *Ann N Y Acad Sci* 1191: 62–88.
52. Hagoort P (2005) On Broca, brain, and binding: a new framework. *Trends Cogn Sci* 9: 416–423.
53. Hickok G, Poeppel D (2000) Towards a functional neuroanatomy of speech perception. *Trends Cogn Sci* 4: 131–138.
54. Damasio H, Tranel D, Grabowski T, Adolphs R, Damasio A (2004) Neural systems behind word and concept retrieval. *Cognition* 92: 179–229.
55. Cabeza R, Nyberg L (2000) Imaging cognition II: An empirical review of 275 PET and fMRI studies. *J Cogn Neurosci* 12: 1–47.
56. Filimon F, Nelson JD, Hagler DJ, Sereno MI (2007) Human cortical representations for reaching: mirror neurons for execution, observation, and imagery. *Neuroimage* 37: 1315–1328.
57. Decety J, Grèzes J (1999) Neural mechanisms subserving the perception of human actions. *Trends Cogn Sci* 3: 172–178.
58. Grèzes J, Decety J (2001) Functional anatomy of execution, mental simulation, observation, and verb generation of actions: a meta-analysis. *Hum Brain Mapp* 12: 1–19.
59. Emmorey K, Xu J, Gannon P, Goldin-Meadow S, Braun A (2010) CNS activation and regional connectivity during pantomime observation: no engagement of the mirror neuron system for deaf signers. *Neuroimage* 49: 994–1005.
60. Biagi L, Cioni G, Fogassi L, Guzzetta A, Tosetti M (2010) Anterior intraparietal cortex codes complexity of observed hand movements. *Brain Res Bull* 81: 434–440.
61. Buxbaum LJ, Kyle KM, Menon R (2005) On beyond mirror neurons: internal representations subserving imitation and recognition of skilled object-related actions in humans. *Brain Res Cogn Brain Res* 25: 226–239.
62. Davare M, Rothwell JC, Lemon RN (2010) Causal connectivity between the human anterior intraparietal area and premotor cortex during grasp. *Curr Biol* 20: 176–181.
63. Jastorff J, Begliomini C, Fabbri-Destro M, Rizzolatti G, Orban GA (2010) Coding observed motor acts: different organizational principles in the parietal and premotor cortex of humans. *J Neurophysiol* 104: 128–140.
64. Perno AC, Tubaldi F, Turella L, Grossi P, Barachino L, et al. (2009) Neurofunctional modulation of brain regions by the observation of pointing and grasping actions. *Cereb Cortex* 19: 367–374.
65. Faillenot I, Toni I, Decety J, Grègoire MC, Jeannerod M (1997) Visual pathways for object-oriented action and object recognition: functional anatomy with PET. *Cereb Cortex* 7: 77–85.
66. Husain FT, Patkin DJ, Thai-Van H, Braun AR, Horwitz B (2009) Distinguishing the processing of gestures from signs in deaf individuals: an fMRI study. *Brain Res* 1276: 140–150.
67. Molnar-Szakacs I, Wu AD, Robles FJ, Iacoboni M (2007) Do you see what I mean? Corticospinal excitability during observation of culture-specific gestures. *PLoS One* 2: e626.
68. Nakamura A, Maess B, Knösche TR, Gunter TC, Bach P, et al. (2004) Cooperation of different neuronal systems during hand sign recognition. *Neuroimage* 23: 25–34.
69. Beattie G, Shovelton H (2000) Iconic hand gestures and the predictability of words in context in spontaneous speech. *Br J Psychol* 91 (Pt 4): 473–491.
70. Ozyürek A, Willems RM, Kita S, Hagoort P (2007) On-line integration of semantic information from speech and gesture: insights from event-related brain potentials. *J Cogn Neurosci* 19: 605–616.
71. Wu YC, Coulson S (2007) How iconic gestures enhance communication: an ERP study. *Brain Lang* 101: 234–245.
72. McNeill D (2005) *Gesture and thought*. Chicago: University of Chicago Press. pp. xii, 318p.
73. Buccino G, Binkofski F, Fink GR, Fadiga L, Fogassi L, et al. (2001) Action observation activates premotor and parietal areas in a somatotopic manner: an fMRI study. *Eur J Neurosci* 13: 400–404.
74. Buccino G, Vogt S, Ritzl A, Fink GR, Zilles K, et al. (2004) Neural circuits underlying imitation learning of hand actions: an event-related fMRI study. *Neuron* 42: 323–334.
75. Chaminade T, Meltzoff AN, Decety J (2005) An fMRI study of imitation: action representation and body schema. *Neuropsychologia* 43: 115–127.
76. Chong TT, Williams MA, Cunnington R, Mattingley JB (2008) Selective attention modulates inferior frontal gyrus activity during action observation. *Neuroimage* 40: 298–307.
77. Lotze M, Heymans U, Birbaumer N, Veit R, Erb M, et al. (2006) Differential cerebral activation during observation of expressive gestures and motor acts. *Neuropsychologia* 44: 1787–1795.
78. Kircher TT, Brammer M, Tous Andreu N, Williams SC, McGuire PK (2001) Engagement of right temporal cortex during processing of linguistic context. *Neuropsychologia* 39: 798–809.
79. Gaillard WD, Balsamo L, Xu B, McKinney C, Papero PH, et al. (2004) fMRI language task panel improves determination of language dominance. *Neurology* 63: 1403–1408.
80. Wiggs CL, Weisberg J, Martin A (1999) Neural correlates of semantic and episodic memory retrieval. *Neuropsychologia* 37: 103–118.
81. Thompson-Schill SL, D'Esposito M, Aguirre GK, Farah MJ (1997) Role of left inferior prefrontal cortex in retrieval of semantic knowledge: a reevaluation. *Proc Natl Acad Sci U S A* 94: 14792–14797.
82. Wagner AD, Paré-Blagoev EJ, Clark J, Poldrack RA (2001) Recovering meaning: left prefrontal cortex guides controlled semantic retrieval. *Neuron* 31: 329–338.
83. Kircher T, Saxe K, Saxe O, Krach S (2009) Priming words with pictures: neural correlates of semantic associations in a cross-modal priming task using fMRI. *Hum Brain Mapp* 30: 4116–4128.
84. Saxe O, Weis S, Zellagui N, Huber W, Zvyagintsev M, et al. (2008) Automatic processing of semantic relations in fMRI: neural activation during semantic priming of taxonomic and thematic categories. *Brain Res* 1218: 194–205.
85. Saxe O, Weis S, Krings T, Huber W, Kircher T (2008) Categorical and thematic knowledge representation in the brain: neural correlates of taxonomic and thematic conceptual relations. *Neuropsychologia* 46: 409–418.
86. Saxe O, Weis S, Zellagui N, Saxe K, Huber W, et al. (2011) How different types of conceptual relations modulate brain activation during semantic priming. *J Cogn Neurosci* 23: 1263–1273.
87. Saxe K, Krach S, Saxe O, Kircher T (2009) Lion – tiger – stripes: Neural correlates of indirect semantic priming across processing modalities. *Neuroimage* 45: 224–236.
88. Saxe K, Saxe O, Krach S, Kircher T (2009) Taxonomic and thematic categories: Neural correlates of categorization in an auditory-to-visual priming task using fMRI. *Brain Res* 1270: 78–87.
89. Tivarus ME, Ibinson JW, Hillier A, Schmalbrock P, Beversdorf DQ (2006) An fMRI study of semantic priming: modulation of brain activity by varying semantic distances. *Cogn Behav Neurol* 19: 194–201.
90. Johnson-Frey SH (2004) The neural bases of complex tool use in humans. *Trends Cogn Sci* 8: 71–78.
91. Culham JC, Valyear KF (2006) Human parietal cortex in action. *Curr Opin Neurobiol* 16: 205–212.
92. Fadiga L, Craighero L (2006) Hand actions and speech representation in Broca's area. *Cortex* 42: 486–490.
93. Binder JR, Desai RH, Graves WW, Conant LL (2009) Where is the semantic system? A critical review and meta-analysis of 120 functional neuroimaging studies. *Cereb Cortex* 19: 2767–2796.
94. Patterson K, Nestor PJ, Rogers TT (2007) Where do you know what you know? The representation of semantic knowledge in the human brain. *Nat Rev Neurosci* 8: 976–987.
95. Valyear KF, Gallivan JP, McLean DA, Culham JC (2012) fMRI repetition suppression for familiar but not arbitrary actions with tools. *J Neurosci* 32: 4247–4259.
96. Buckner RL, Koutstaal W, Schacter DL, Rosen BR (2000) Functional MRI evidence for a role of frontal and inferior temporal cortex in amodal components of priming. *Brain* 123 Pt 3: 620–640.
97. Hickok G, Poeppel D (2007) The cortical organization of speech processing. *Nat Rev Neurosci* 8: 393–402.
98. Novick JM, Trueswell JC, Thompson-Schill SL (2005) Cognitive control and parsing: reexamining the role of Broca's area in sentence comprehension. *Cogn Affect Behav Neurosci* 5: 263–281.
99. Kuperberg GR, Sitnikova T, Lakshmanan BM (2008) Neuroanatomical distinctions within the semantic system during sentence comprehension: evidence from functional magnetic resonance imaging. *Neuroimage* 40: 367–388.
100. Corballis MC (2003) From mouth to hand: gesture, speech, and the evolution of right-handedness. *Behav Brain Sci* 26: 199–208; discussion 208–160.
101. Corballis MC (2010) Mirror neurons and the evolution of language. *Brain Lang* 112: 25–35.
102. Gentilucci M, Corballis MC (2006) From manual gesture to speech: a gradual transition. *Neurosci Biobehav Rev* 30: 949–960.
